# Supplementary material for: Hydrophobized lignin nanoparticle-stabilized Pickering foams: building blocks for sustainable lightweight porous materials
Source: Royal Society of Chemistry journal article supplement (doi:10.1039/d4ma00295d), 2024-01-01
Supplement: d4ma00295d1.pdf [file d4ma00295d1.pdf]

## Supporting Information for

# Hydrophobized Lignin Nanoparticle-Stabilized Pickering Foams: Building Blocks for Sustainable Lightweight Porous Materials

*Tao Zou,<sup>1,2</sup> Erfan Kimiaei,<sup>1</sup> Zahra Madani,<sup>3</sup> Muzaffer A. Karaaslan,<sup>2</sup> Jaana Vapaavuori,<sup>3</sup> Johan Foster,<sup>4</sup> Scott Renneckar,<sup>2</sup> and Monika Österberg<sup>1\*</sup>*

<sup>1</sup>Department of Bioproducts and Biosystems, School of Chemical Engineering, Aalto University, Espoo, Finland

<sup>2</sup>Department of Wood Science, University of British Columbia, 2424 Main Mall, Vancouver, British Columbia V6T 1Z4, Canada

<sup>3</sup>Department of Chemistry and Materials Science, School of Chemical Engineering, Aalto University, Espoo, Finland

<sup>4</sup>Department of Chemical and Biological Engineering, University of British Columbia, CHBE 421, 2360 East Mall, Vancouver V6T 1Z3, British Columbia, Canada

Corresponding author: [monika.osterberg@aalto.fi](mailto:monika.osterberg@aalto.fi), +358505497218

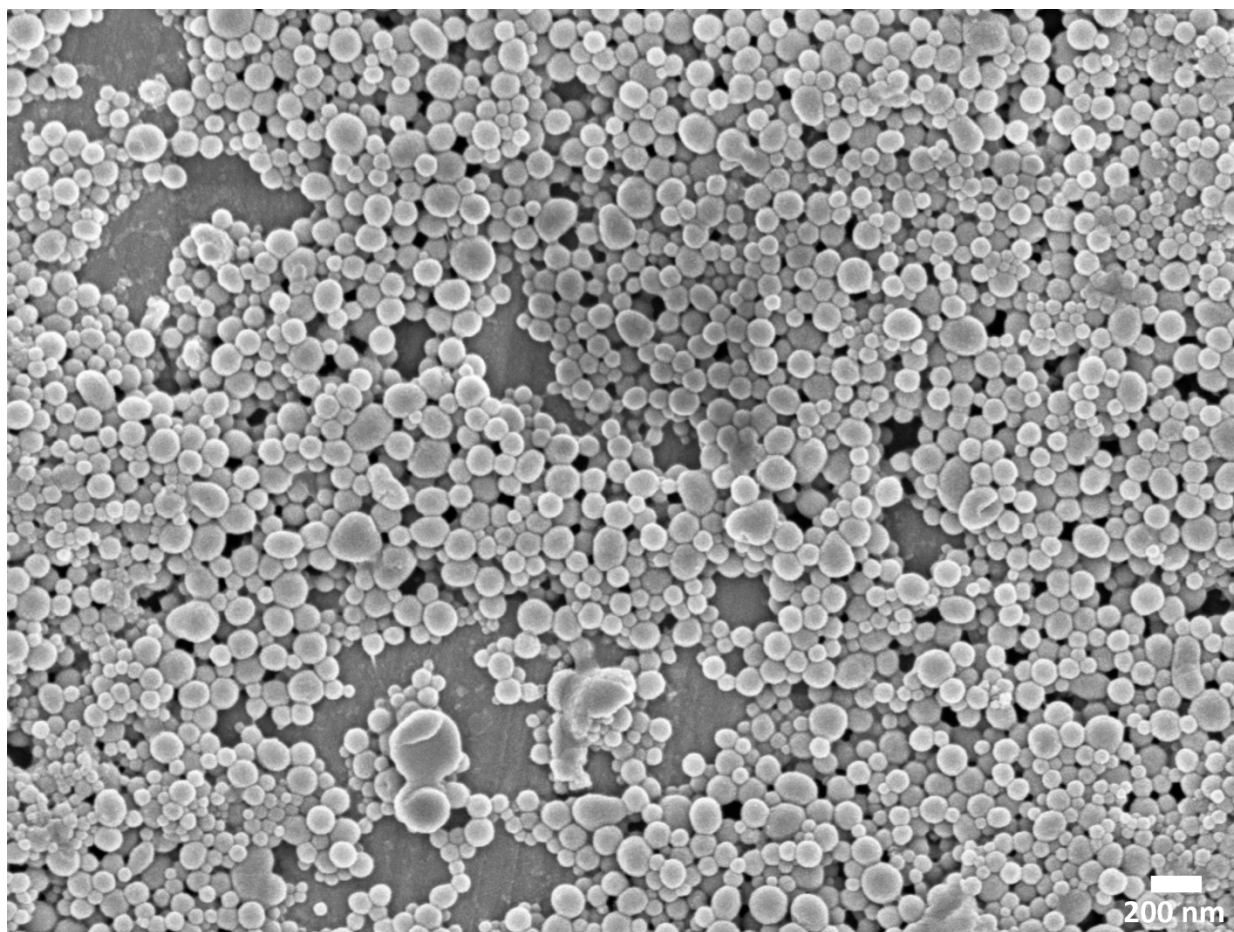

**Figure S1.** The morphology of LNPs captured by SEM microscopy.

**Table S1.** Foam formulations at the CTAB to LNP coating ratio from 0 to 15 mg/g. The initial concentrations of LNP aqueous dispersion and CTAB aqueous solution were 5 wt% and 1 wt%, respectively.

| <b>CTAB to LNP ratio (mg/g)</b>     | <b>0.0</b> | <b>2.5</b> | <b>5.0</b> | <b>7.5</b> | <b>10.0</b> | <b>12.0</b> | <b>15.0</b> |
|-------------------------------------|------------|------------|------------|------------|-------------|-------------|-------------|
| <b>LNPs aqueous dispersion (ml)</b> | 5.0        | 5.0        | 5.0        | 5.0        | 5.0         | 5.0         | 5.0         |
| <b>CTAB aqueous solution (ml)</b>   | 0.0        | 0.1        | 0.1        | 0.2        | 0.3         | 0.3         | 0.4         |
| <b>Total solid content (wt%)</b>    | 5.0        | 5.0        | 4.9        | 4.9        | 4.8         | 4.8         | 4.7         |

**Table S2.** Foam formulations with varied CNF fractions. The initial concentrations of LNP aqueous dispersion, CTAB aqueous solution, and CNF aqueous dispersion were 6.5 wt%, 1 wt%, and 2.1 wt%, respectively.

| <b>CNF fractions relative to the total solid mass (wt%)</b> | <b>30</b> | <b>40</b> | <b>50</b> |
|-------------------------------------------------------------|-----------|-----------|-----------|
| <b>LNPs aqueou dispersion (ml)</b>                          | 8.9       | 7.6       | 6.3       |
| <b>CTAB aqueous solution (ml)</b>                           | 0.3       | 0.3       | 0.2       |
| <b>CNF aqueous dispersion (g)</b>                           | 11.7      | 15.7      | 19.5      |
| <b>Water (ml)</b>                                           | 14.1      | 17.3      | 21.5      |
| <b>Total solid content (wt %)</b>                           | 2.4       | 2.0       | 1.7       |

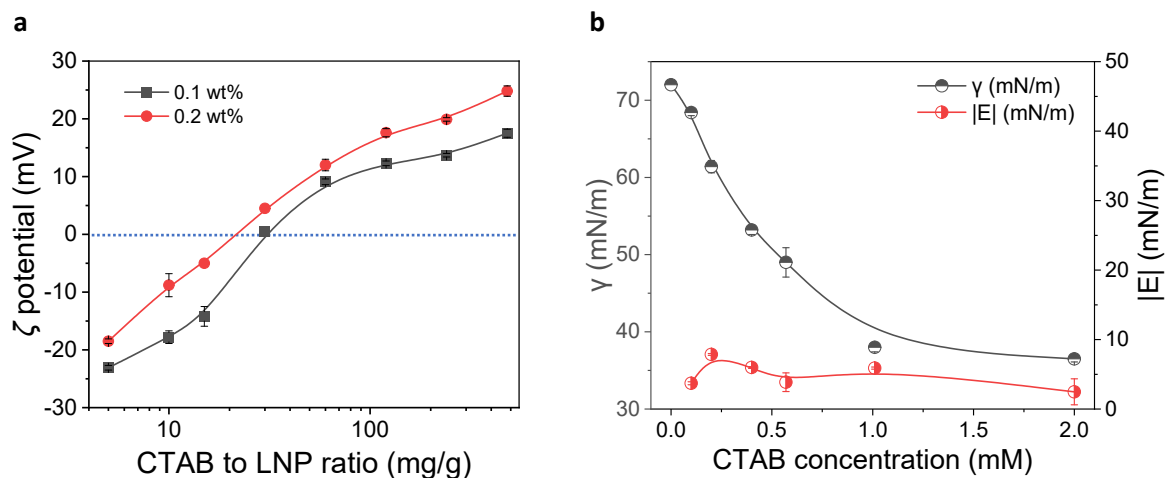

**Figure S2.** (a)  $\zeta$  potential of CTAB-LNPs at varied CTAB to LNP coating ratios, measured at the particle concentrations of 0.1 and 0.2 wt%. It is worth mentioning that the  $\zeta$  potentials of the CTAB-LNPs measured at concentrations above 0.2 wt% were not reliable anymore. The dashed line denotes the  $\zeta$  potential at 0, and the intersections with the black and red lines are the isoelectric points (IEP) for 0.1 wt% and 0.2 wt%, respectively. Particle concentration at 0.2 wt% shows an IEP at a lower CTAB to LNP coating ratio than for 0.1 wt%, due to less available dissociated carboxyl groups per particle as explained in the main article. (b) Surface tension ( $\gamma$ ) and complex viscoelastic modulus ( $|E|$ ) of CTAB aqueous solution plotted against its concentration. The critical micelle concentration is about 1 mM, which is consistent with the literature.<sup>1</sup>



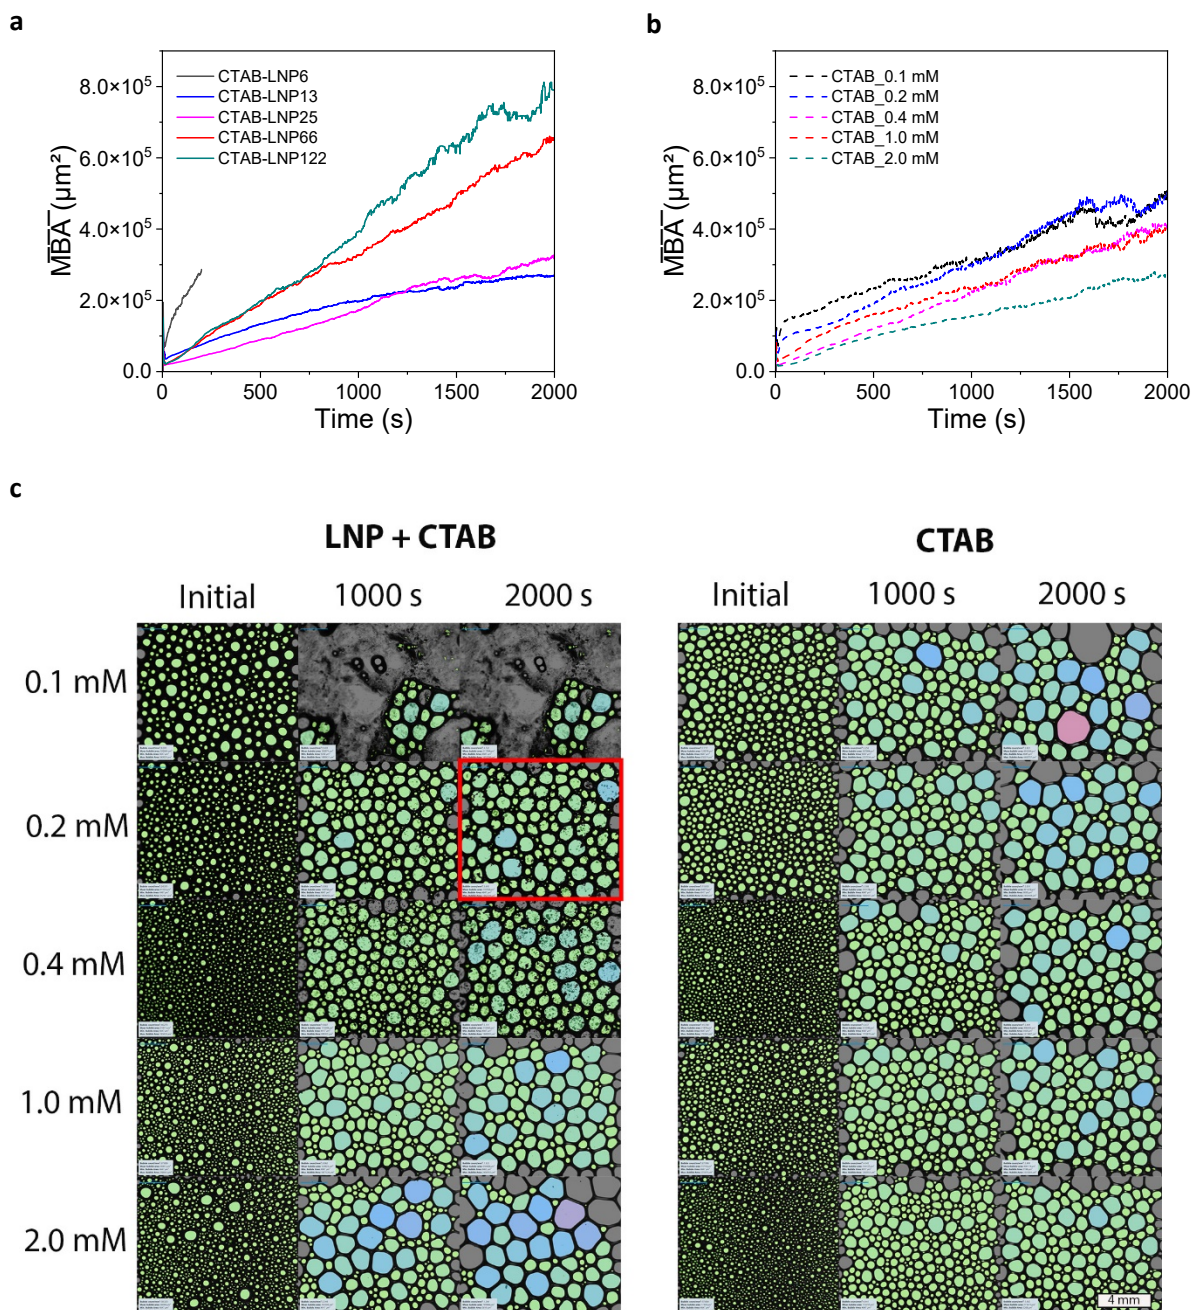

**Figure S3.** (a-b) Mean bubble size area (MBA) as a function of time of the wet foams stabilized by CTAB-LNPs and the pure CTAB. The LNP concentration was fixed at 0.6 wt% and the CTAB concentration varied from 0.1 to 2 mM. The corresponding CTAB to LNP mass ratios varied from 6 to 122 mg/g. (c) The corresponding bubble profiles of the foams right after foaming (initial), 1000 s, and 2000 s after foaming (scale bar: 4 mm). The red box marks the sample with the smallest

MBA at 2000 s after foaming. Note: the foam was generated by air pumping with Krüss DFA100 and the bubble size profiles were monitored for 2000 s after foaming. A 40 mm-diameter prism column (CY4572) and a FL4551 filter paper (pore size of 12-25  $\mu\text{m}$ , diameter of 32 mm) were used for foaming. The initial liquid volume was fixed at 50 ml, the air was pumping through the filter paper at a flow rate of 0.3 L/min and automatically stopped when the total height (liquid height plus foam height) reached 100 mm ( $\sim 120$  mL volume). The air pumping time (foaming time) was found to be between 13 and 14 s for all the samples.

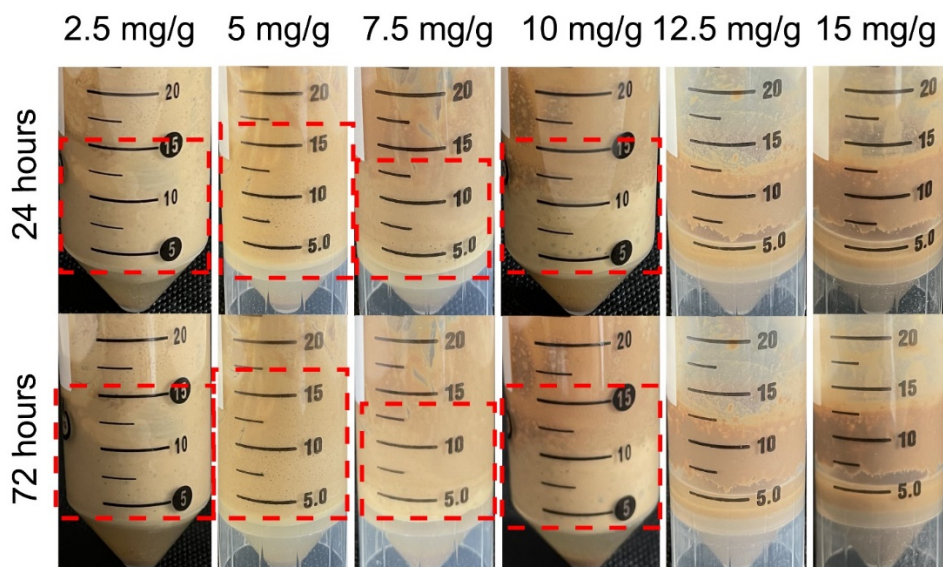

**Figure S4.** The appearance of the Pickering foams captured 24 and 72 hours after foaming. The foams were stabilized by 5 wt% CTAB-LNPs at the CTAB to LNP mass ratio of 2.5 to 15 mg/g. The dashed red boxes mark foam areas.



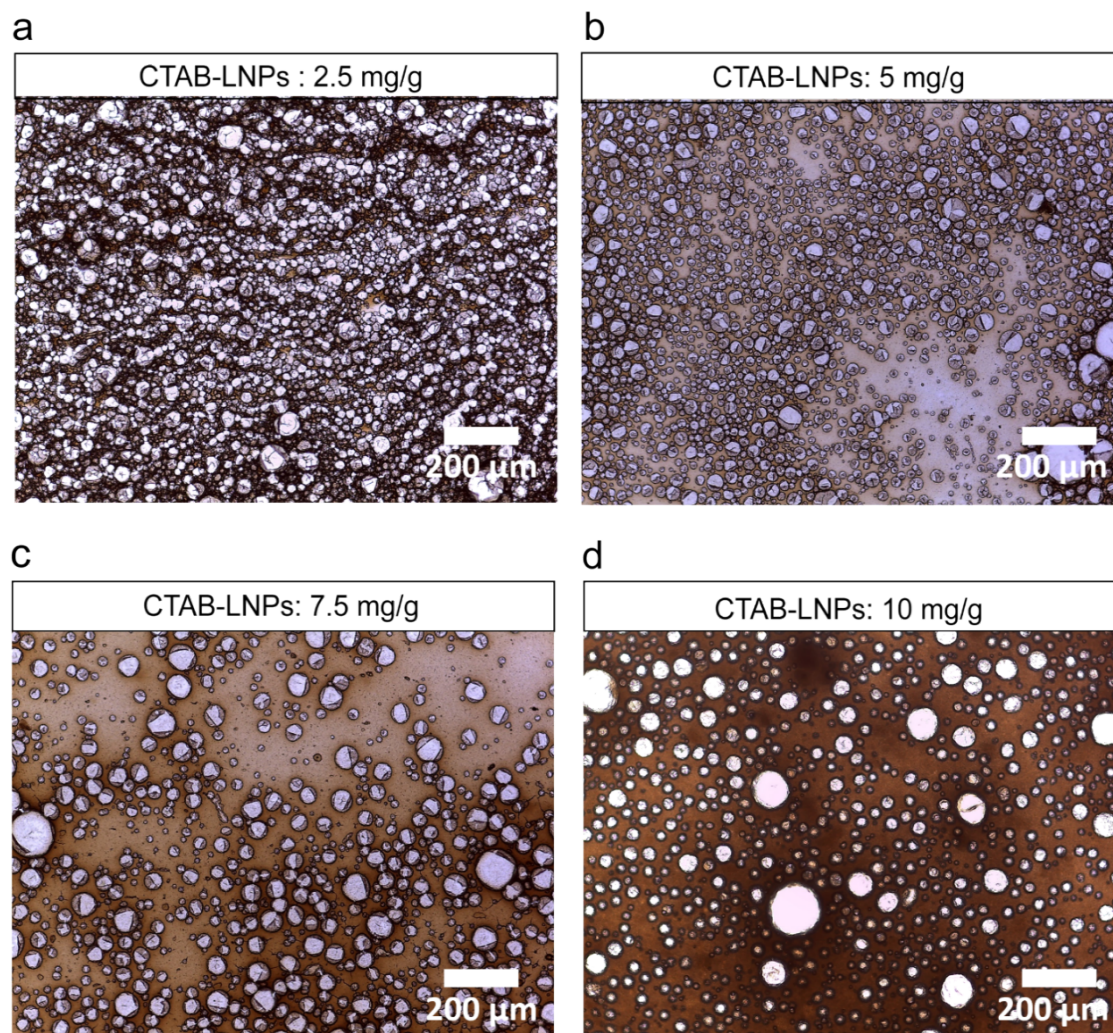

**Figure S5.** Optical microscopic images of the wet Pickering foams stabilized by 5 wt% CTAB-LNPs (the mass ratio of CTAB to LNP varies from 2.5 to 10 mg/g). The images were captured 3 hours after foaming. The foams were mostly dried while being captured by the optical microscope, indicating the strong stability of these Pickering foams against rupture upon drying.

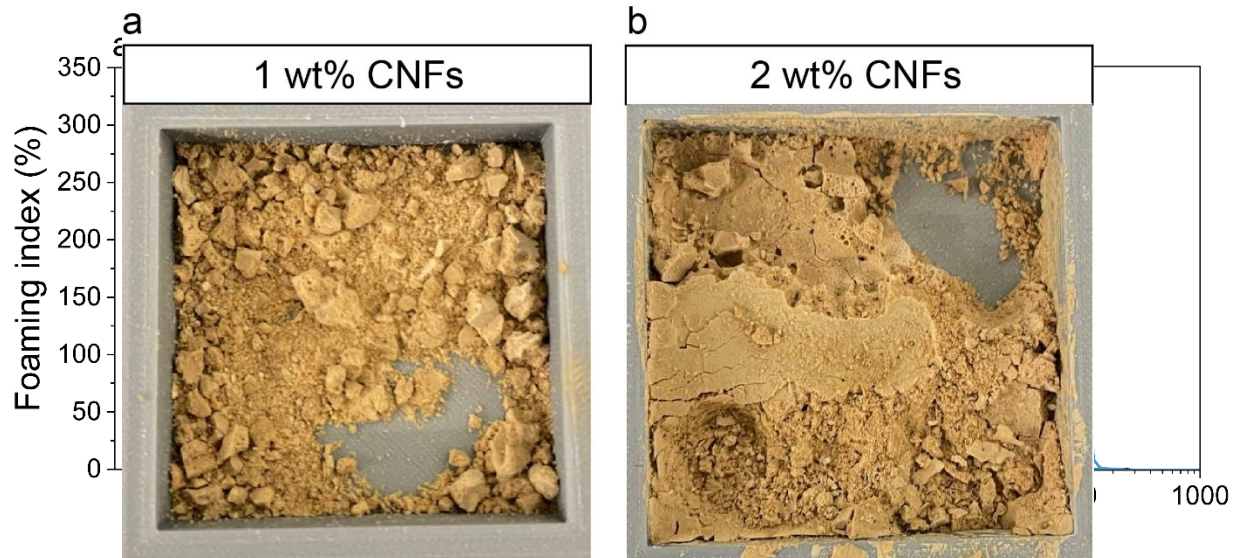

**Figure** Foaming the stage hours of

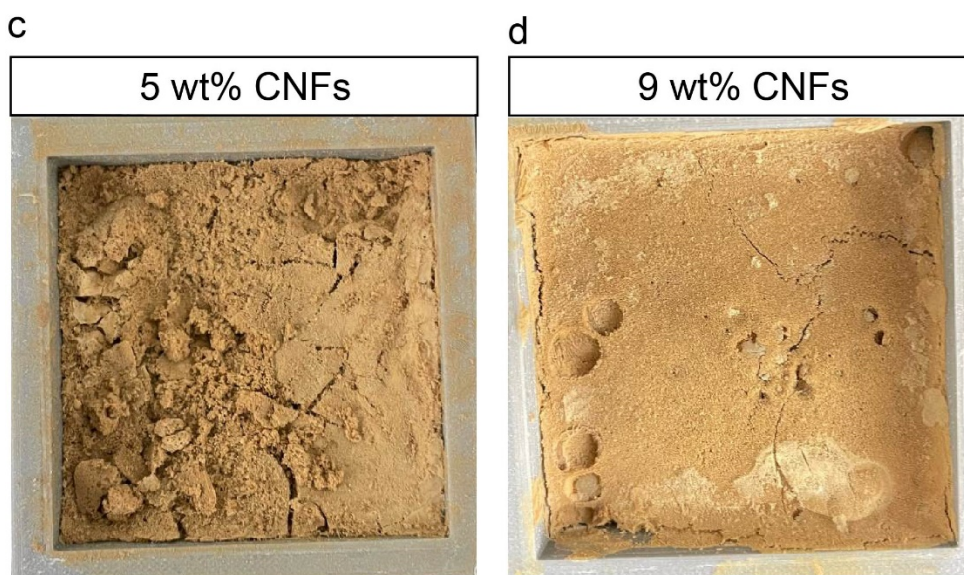

**S6. (a)** index at initial and 72 the

Pickering foams stabilized by 5 wt% CTAB-LNPs (5 mg/g) with the addition of CNFs (1 to 9 wt% relative to the total solid mass). (b) Bubble size distributions of the foams measured 3 days after foaming.

**Figure S7.** Appearance of the dry foams at the CNF fractions of (a) 1 wt%, (b) 2 wt%, (c) 5 wt%, (d) 9 wt%. The foams were freeze-dried from the Pickering foams described in Figure S6.



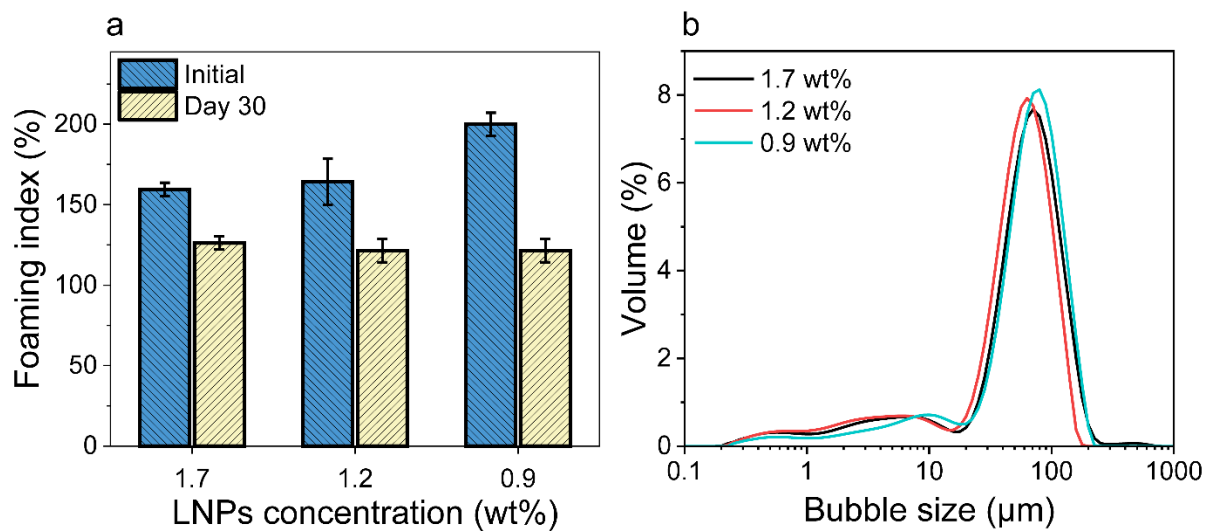

**Figure S8.** (a) Foaming index at the initial stage and day 30 of the Pickering foams stabilized by CTAB-LNPs (5 mg/g) at the concentrations of 0.9, 1.2, and 1.7 wt%. (b) Bubble size distributions of the foams measured 3 days after foaming.

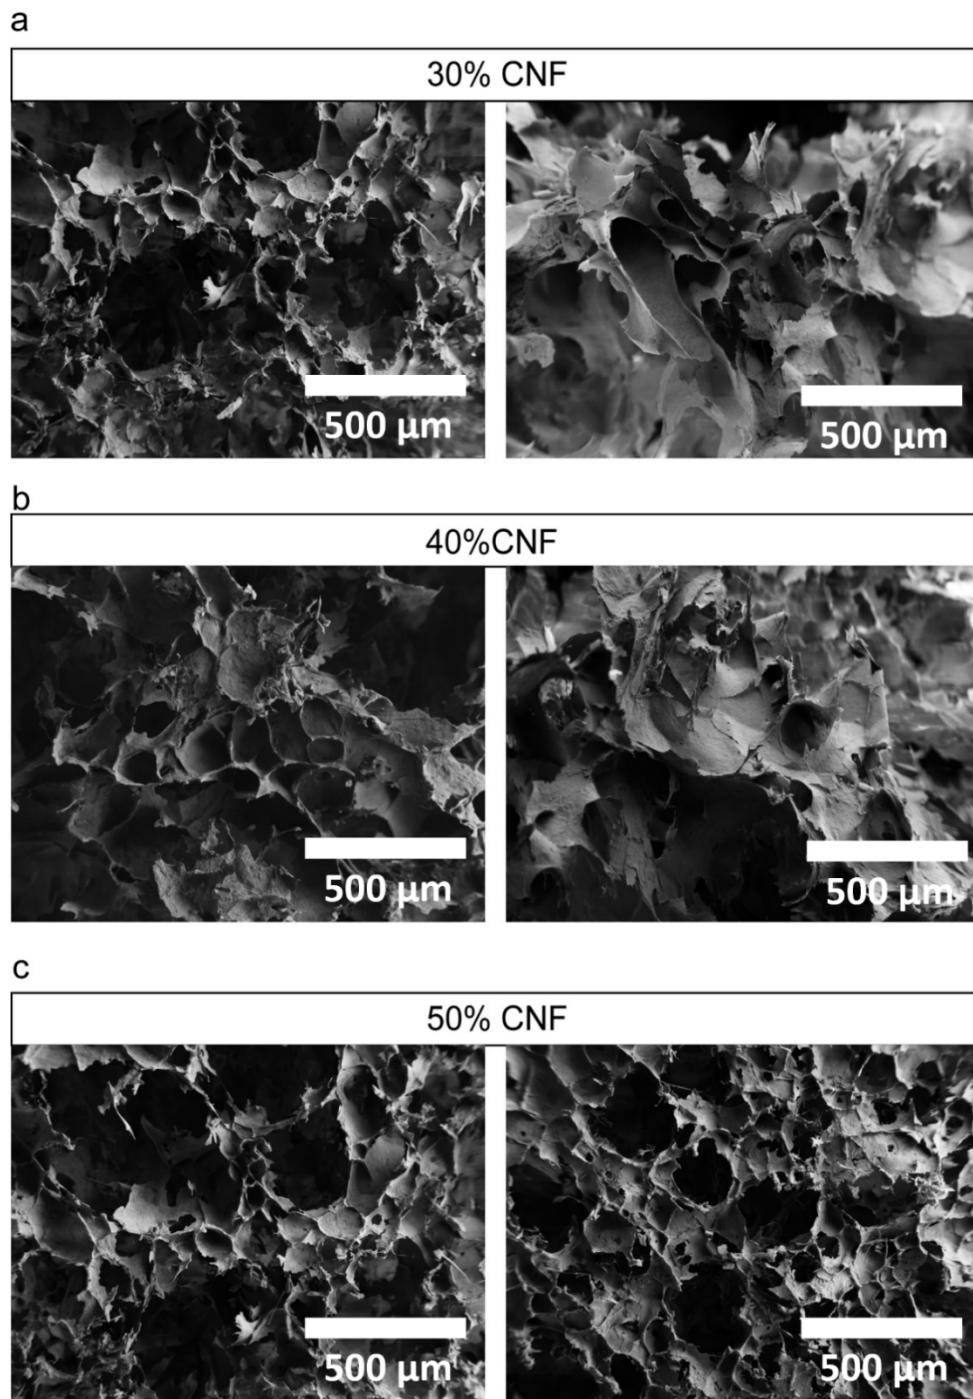

**Figure S9.** SEM images captured from the cross sections of the dry composite foams comprised of CTAB-LNPs (5 mg/g) and CNFs at the CNF fractions of 30 wt%, 40 wt%, and 50 wt% (relative to the total solid mass), respectively.

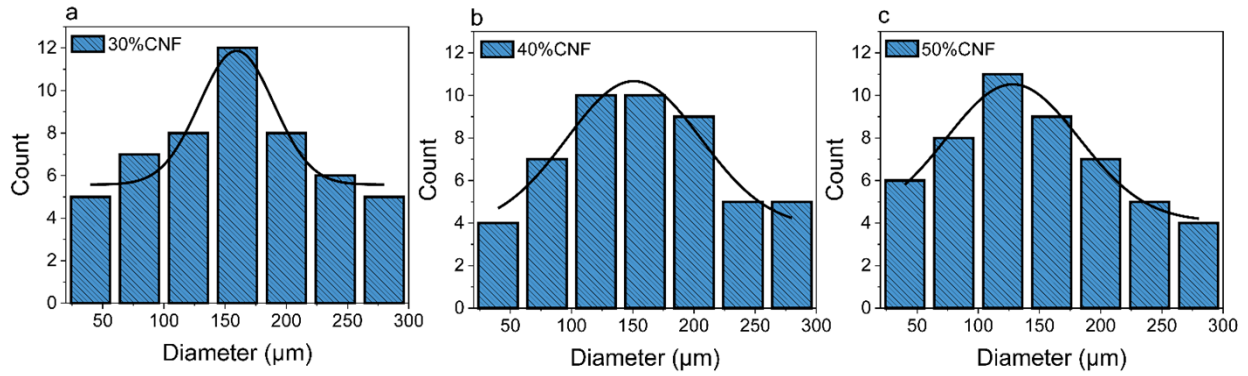

**Figure S10.** The cell size distributions of the foams calculated based on the SEM images (Figure 4b, f, j and Figure S9) and fitted using a Gaussian function.

**Figure S11.** The thermal insulation experimental setup. (a) IR thermal camera. (b) Hot plate with a copper plate on it. (c) Thermometer to ensure the constant temperature of the hot plate at 120 °C.



**Table S3.** The average surface temperature of the foams at 1 min and 60 min after being heated on a hot copper plate at 120 °C.

| <b>Sample</b>        | <b>Time (min)</b> | <b>Average (°C)</b> | <b>Minimum (°C)</b> | <b>Maximum (°C)</b> | <b>Span</b> | <b>Standard deviation</b> |
|----------------------|-------------------|---------------------|---------------------|---------------------|-------------|---------------------------|
| <b>30% CNF</b>       | 1                 | 48.02               | 39.22               | 66.69               | 27.47       | 4.10                      |
|                      | 60                | 63.56               | 34.45               | 96.89               | 62.44       | 6.89                      |
| <b>40% CNF</b>       | 1                 | 47.81               | 32.40               | 64.46               | 32.06       | 4.04                      |
|                      | 60                | 65.17               | 41.75               | 93.62               | 51.87       | 7.55                      |
| <b>50% CNF</b>       | 1                 | 45.92               | 34.41               | 72.19               | 37.78       | 4.62                      |
|                      | 60                | 62.69               | 40.64               | 97.12               | 56.48       | 4.47                      |
| <b>Rigid PU foam</b> | 1                 | 41.06               | 37.86               | 77.55               | 39.69       | 3.92                      |
|                      | 60                | 51.34               | 28.59               | 72.96               | 44.37       | 3.58                      |

## Reference

- (1) Li, N.; Liu, S.; Luo, H. A New Method for the Determination of the First and Second Cmc in Ctab Solution by Resonance Rayleigh Scattering Technology. *Anal. Lett.* **2002**, *35* (7), 1229–1238. <https://doi.org/10.1081/AL-120005975>.
